# Supplementary material for: Utilization of the Hollies (Ilex L. spp.): A Review
Source: MDPI journal article supplement (doi:10.3390/f13010094), 2022-01-10
Supplement: s1 [file s1]

**Supplementary File for:**  
**Utilization of the hollies (*Ilex* L. spp.): A review**

Xin Yao, Fan Zhang, and Richard T. Corlett

**Literature search strategy:**

We initially searched Google Scholar using the terms “intitle:(*Ilex* -*Quercus* -oak AND tea OR beverage)”, “intitle:(*Ilex* -*Quercus* -oak AND medicine)”, “intitle:(*Ilex* -*Quercus* -oak AND ornamental OR cultivar)”, “intitle:(*Ilex* -*Quercus* -oak AND honey plant OR apiculture)”, “intitle:(*Ilex* -*Quercus* -oak AND timber)”, and “intitle:(*Ilex* -*Quercus* -oak AND dye)”, and Scopus using “TITLE-ABS-KEY (tea OR beverage AND *Ilex* AND NOT *Quercus* AND NOT oak)”, “TITLE-ABS-KEY (medicine AND *Ilex* AND NOT *Quercus* AND NOT oak)”, “TITLE-ABS-KEY (ornamental OR cultivar AND *Ilex* AND NOT *Quercus* AND NOT oak)”, “TITLE-ABS-KEY (honey plant OR apiculture AND *Ilex* AND NOT *Quercus* AND NOT oak)”, “TITLE-ABS-KEY (timber AND *Ilex* AND NOT *Quercus* AND NOT oak)”, and “TITLEABS-KEY (dye AND *Ilex* AND NOT *Quercus* AND NOT oak)”. Because China and South America are species hotspots, we also searched using the same terms in Chinese in the China National Knowledge Infrastructure (CNKI), the largest scholarly search engine in China, and in Spanish, Portuguese, and English in the Scientific Electronic Library Online (SciELO), which covers the literature in South America. These additional searches included literature in Chinese, Spanish, and Portuguese. All these searches were conducted on 8 February 2021. To ensure completeness, we have subsequently added a few additional publications from updated searches of the same databases, from PubMed Central, and from personal communications from multiple knowledgeable people. A total of 158 publications were finally consulted, including book chapters, reports, and papers. There is substantial overlap between sources so not all are cited in this review.

This search of the published literature was supplemented by searches on Google for grey-literature sources and informal checks on product websites for teas, medicines, timber, honey, and decorative items.
