# Supplementary material for: Utilization of the Hollies (Ilex L. spp.): A Review
Source: MDPI journal article supplement (doi:10.3390/f13010094), 2022-01-10
Supplement: s1 [file s1]

Archive with 1 entries (1 files):
- forests-1497754-supplementary.pdf
